# Supplementary material
Source: publisher site journal article supplement (https://www.dovepress.com/article/297842)
Supplement: Supplementary file 1 [file get_supplementary_file.php]

**
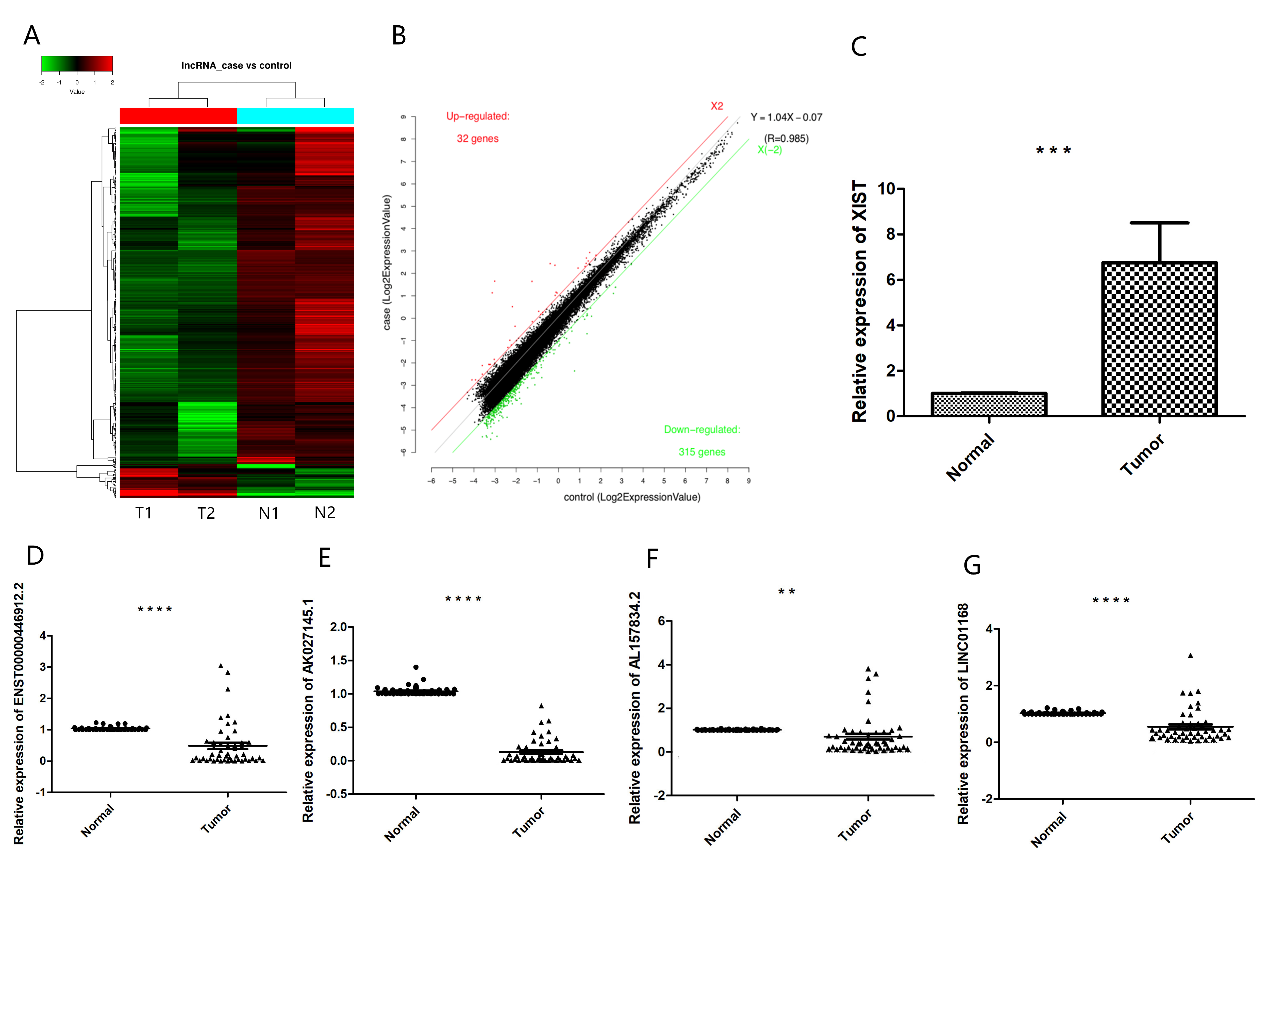
Supplementary Figure** 1: **A-B.** LncRNA ChIP sequencing of blood samples of 2 WT and 2 healthy controls revealed 32 upregulated lncRNAs. RT-qPCR analysis of 49 pairs of matched WT and adjacent non-tumor samples showing the relative expression levels of **C.** Relative XIST lncRNA levels; and **D-G.** ENST00000446912.2, AL157834.2, LINC01168, AK027145.1 in WT and adjacent normal tissues. **P* <0.05, ***P* <0.01, ****P* <0.001. C, tumor tissue; N, normal tissue.
